# Supplementary material for: QRS Fragmentation in Preserved Ejection Fraction Heart Failure: Functional Insights, Pathological Correlates, and Prognosis
Source: PubMed Central journal article supplement — J Am Heart Assoc. 2023 Mar 9;12(6):e028105. doi: 10.1161/JAHA.122.028105 (PMC10111515; doi:10.1161/jaha.122.028105), 2023-03-09

# **SUPPLEMENTAL MATERIAL**

## **Supplemental Methods**

### **Data S1**

#### ***Study Participants Selection and Exclusion Criteria:***

The medical history includes hypertension, diabetes, hyperlipidemia treatment, atrial fibrillation, stroke, known coronary artery disease, end-stage renal disease [ESRD] or those underwent hemodialysis) and hospitalization from patients reimbursed by the National Health Insurance Bureau of Taiwan were extracted via electronic medical records review. Discharged HF diagnosis was defined as patients with acute decompensated heart failure receiving intravenous diuretics with evidence of pulmonary congestion/edema requiring hospitalization.

**Table S1. Baseline characteristics of study subjects categorized by QRS duration  $\leq 110$ ms or  $> 110$ ms**

| <b>QRS duration</b>                               | <b>QRS duration <math>\leq 110</math> ms<br/>Number =826</b> | <b>QRS duration <math>&gt; 110</math> ms<br/>Number =117</b> | <b><i>p</i> value</b> |
|---------------------------------------------------|--------------------------------------------------------------|--------------------------------------------------------------|-----------------------|
| Demographics                                      |                                                              |                                                              |                       |
| Age, years                                        | 76.4 $\pm$ 12.7                                              | 75.78 $\pm$ 13.1                                             | 0.622                 |
| Male, number (%)                                  | 286 (34.62%)                                                 | 64 (54.7%)                                                   | <0.001                |
| Height, m                                         | 1.56 $\pm$ 0.08                                              | 1.59 $\pm$ 0.1                                               | 0.023                 |
| Weight, kg                                        | 60.04 $\pm$ 14.23                                            | 63.84 $\pm$ 15.87                                            | 0.009                 |
| Body mass index, kg/m <sup>2</sup>                | 24.68 $\pm$ 6.31                                             | 25.31 $\pm$ 5.95                                             | 0.327                 |
| Systolic blood pressure, mmHg                     | 141.67 $\pm$ 33.04                                           | 136.98 $\pm$ 30.35                                           | 0.148                 |
| Diastolic blood pressure, mmHg                    | 73.73 $\pm$ 17.92                                            | 69.2 $\pm$ 18.34                                             | 0.011                 |
| Heart rate, bpm                                   | 90.36 $\pm$ 21.75                                            | 90.71 $\pm$ 23.24                                            | 0.872                 |
| History, number (%)                               |                                                              |                                                              |                       |
| Prior heart failure, number (%)                   | 449 (54.36%)                                                 | 67 (57.26%)                                                  | 0.555                 |
| Hypertension, number (%)                          | 607 (73.49%)                                                 | 85 (72.65%)                                                  | 0.848                 |
| Diabetes mellitus, number (%)                     | 413 (50%)                                                    | 63 (53.85%)                                                  | 0.437                 |
| Coronary artery disease, number (%)               | 151 (18.28%)                                                 | 29 (24.79%)                                                  | 0.094                 |
| End stage renal disease/ hemodialysis, number (%) | 95 (11.5%)                                                   | 17 (14.53%)                                                  | 0.344                 |
| Hyperlipidemia, number (%)                        | 152 (18.4%)                                                  | 20 (17.09%)                                                  | 0.732                 |
| Stroke, number (%)                                | 145 (17.55%)                                                 | 19 (16.24%)                                                  | 0.726                 |
| Atrial fibrillation, number (%)                   | 160 (19.37%)                                                 | 24 (20.51%)                                                  | 0.771                 |
| Peripheral artery disease, number (%)             | 57 (6.9%)                                                    | 8 (6.84%)                                                    | 0.980                 |

|                                              |                      |                       |       |
|----------------------------------------------|----------------------|-----------------------|-------|
| Laboratory                                   |                      |                       |       |
| White blood cells, $\times 10^3/\mu\text{L}$ | 10.04 $\pm$ 5.19     | 10.85 $\pm$ 6.30      | 0.129 |
| Lymphocyte, $\times 10^3/\mu\text{L}$        | 15.15 $\pm$ 10.56    | 13.71 $\pm$ 11.01     | 0.174 |
| Hemoglobin, g/dl                             | 10.45 $\pm$ 2.44     | 10.35 $\pm$ 2.55      | 0.679 |
| Fasting glucose, mg/dl                       | 176.57 $\pm$ 113.09  | 168.74 $\pm$ 109.35   | 0.485 |
| eGFR, ml/min/1.73m <sup>2</sup>              | 41.5 $\pm$ 33.08     | 37.59 $\pm$ 32.28     | 0.231 |
| Albumin, g/dl                                | 3.32 $\pm$ 0.59      | 3.36 $\pm$ 0.63       | 0.521 |
| ALT, u/l                                     | 61.20 $\pm$ 157.44   | 65.94 $\pm$ 116.61    | 0.775 |
| Serum sodium, mmol/L                         | 130.71 $\pm$ 8.51    | 129.3 $\pm$ 7.24      | 0.089 |
| Serum potassium, mmol/L                      | 5.21 $\pm$ 1.26      | 5.48 $\pm$ 1.28       | 0.031 |
| BNP, pg/mL                                   | 991.36 $\pm$ 1115.25 | 1001.95 $\pm$ 1193.00 | 0.926 |
| Measurement                                  |                      |                       |       |
| LVEF, %                                      | 64.72 $\pm$ 6.48     | 64.13 $\pm$ 6.70      | 0.358 |
| Prognostic nutritional score                 | 41.09 $\pm$ 8.99     | 41.19 $\pm$ 9.23      | 0.913 |
| Medications, number (%)                      |                      |                       |       |
| ACEI/ARB                                     | 295 (35.71%)         | 31 (26.5%)            | 0.050 |
| Beta-blocker                                 | 169 (20.46%)         | 23 (19.66%)           | 0.840 |
| Aldosterone antagonists                      | 138 (16.71%)         | 17 (14.53%)           | 0.553 |
| Digoxin                                      | 48 (5.81%)           | 5 (4.27%)             | 0.500 |
| Diuretics                                    | 370 (44.79%)         | 54 (46.15%)           | 0.782 |

ALT: alanine transaminase; LVEF: left ventricular ejection fraction; ACEI, angiotensin-converting enzyme inhibitor; ARB, angiotensin II-receptor blocker; BNP, B-type natriuretic peptide; BMI, body mass index; eGFR, estimated glomerular filtration rate; ESRD, end-stage renal disease; HR, heart rate; LVEF, left ventricular ejection fraction;

**Table S2. The LV/RV structure and function in study subjects categorized by QRS duration  $\leq 110$  ms or  $> 110$  ms**

| <b>Fragmented QRS</b>            | <b>QRS <math>\leq 110</math>ms<br/>Number =828</b> | <b>QRS <math>&gt; 110</math>ms<br/>Number =132</b> | <b><i>p</i> value</b> |
|----------------------------------|----------------------------------------------------|----------------------------------------------------|-----------------------|
| <b>LV structure</b>              |                                                    |                                                    |                       |
| Septal wall thickness, mm        | 9.97 $\pm$ 1.96                                    | 10.33 $\pm$ 2.00                                   | 0.052                 |
| Posterior wall thickness, mm     | 10.02 $\pm$ 1.88                                   | 10.48 $\pm$ 2.13                                   | 0.012                 |
| LV internal dimension, mm        | 46.35 $\pm$ 6.12                                   | 47.90 $\pm$ 6.31                                   | 0.008                 |
| LV EDV index, ml                 | 44.8 $\pm$ 14.7                                    | 45.42 $\pm$ 13.98                                  | 0.650                 |
| LV ESV index, ml                 | 15.2 $\pm$ 9.4                                     | 15.6 $\pm$ 8.8                                     | 0.660                 |
| LVEF, %                          | 68.3 $\pm$ 14.1                                    | 67.5 $\pm$ 13.1                                    | 0.580                 |
| LV mass, gm                      | 164.65 $\pm$ 58.58                                 | 182.05 $\pm$ 72.33                                 | 0.009                 |
| LV mass index, gm/m <sup>2</sup> | 95.37 $\pm$ 30.86                                  | 102.78 $\pm$ 39.24                                 | 0.046                 |
| LV M/V ratio                     | 2.20 $\pm$ 0.89                                    | 2.30 $\pm$ 0.76                                    | 0.313                 |
| <b>LV function</b>               |                                                    |                                                    |                       |
| Mitral E/A ratio                 | 16.57 $\pm$ 7.45                                   | 16.11 $\pm$ 6.55                                   | 0.587                 |
| DT, ms                           | 212.21 $\pm$ 76.28                                 | 200.01 $\pm$ 80.26                                 | 0.090                 |
| IVRT, ms                         | 86.38 $\pm$ 33.07                                  | 89.05 $\pm$ 31.59                                  | 0.386                 |
| TDI-e', cm/s                     | 5.56 $\pm$ 1.78                                    | 5.69 $\pm$ 2.07                                    | 0.528                 |
| TDI-s', cm/s                     | 5.63 $\pm$ 1.36                                    | 5.69 $\pm$ 1.60                                    | 0.731                 |
| Mitral E/TDI-e'                  | 16.57 $\pm$ 7.45                                   | 16.11 $\pm$ 6.55                                   | 0.587                 |
| TR Velocity, m/sec               | 3.02 $\pm$ 0.46                                    | 3.00 $\pm$ 0.44                                    | 0.676                 |

|                                    |             |             |       |
|------------------------------------|-------------|-------------|-------|
| RV structure and function          |             |             |       |
| RV EDA, cm <sup>2</sup>            | 30.82±12.87 | 35.23±17.35 | 0.007 |
| RV ESA, cm <sup>2</sup>            | 16.32±8.63  | 19.27±11.87 | 0.009 |
| RVFAC, %                           | 48.22±7.89  | 46.54±9.12  | 0.031 |
| Atrial structure                   |             |             |       |
| LA Volume index, mL/m <sup>2</sup> | 28.43±13.14 | 29.63±13.56 | 0.353 |
| RA Volume index, mL/m <sup>2</sup> | 22.41±12.71 | 28.46±30.82 | 0.035 |

LV, left ventricular; RV, right ventricular; EDV, end-diastolic volume; EDA, end-diastolic area; ESA, end-systolic area; FAC, fractional area change; ESV, end-systolic volume; LVEF, left ventricular ejection fraction; LVH, left ventricular hypertrophy; LV M/V, left ventricular mass to volume ratio; DT, deceleration time; IVRT, interventricular relaxation time; LA, left atrial; RA, right atrial; TDI, tissue Doppler imaging; TR, tricuspid regurgitation.

**Table S3. The clinical outcome for HHF, CV mortality, all-cause mortality, and composite end-points in non-fQRS, inferior fQRS, anterior/lateral fQRS**

|                                   |   | Hospitalization for Heart failure (HHF) |                                     |                                       | CV Mortality        |                                       |                                       |
|-----------------------------------|---|-----------------------------------------|-------------------------------------|---------------------------------------|---------------------|---------------------------------------|---------------------------------------|
| Fragmented QRS                    |   | Non-fQRS                                | Inferior fQRS                       | Anterior/Lateral fQRS                 | Non-fQRS            | Inferior fQRS                         | Anterior/Lateral fQRS                 |
| events, n (%)                     | N | 459 (69.9%)                             | 143 (65%)                           | 44 (53%)                              | 551 (83.9%)         | 172 (78.2%)                           | 59 (71.1%)                            |
|                                   | Y | 198 (30.1%)                             | 77 (35%)                            | 39 (47%)                              | 106 (16.1%)         | 48 (21.8%)                            | 24 (28.9%)                            |
| Event Rate (per 100 person-years) |   | 11.4                                    | 14.2                                | 23.4                                  | 5.9                 | 8.5                                   | 12.9                                  |
| Crude Model                       |   | (Reference)                             | 1.20 [0.92, 1.57]<br><i>p</i> =0.17 | 1.90 [1.35, 2.68]*<br><i>p</i> <0.001 | (Reference)         | 1.40 [1.00, 1.97]<br><i>p</i> =0.052  | 1.98 [1.27, 3.08]*<br><i>p</i> =0.003 |
| Model 1<br>(HR) (95% CI)          |   | (Reference)                             | 1.20 [0.92, 1.56]<br><i>p</i> =0.17 | 1.89 [1.34, 2.66]*<br><i>p</i> <0.001 | (Reference)         | 1.44 [1.02, 2.03]*<br><i>p</i> =0.036 | 2.16 [1.38, 3.37]*<br><i>p</i> =0.001 |
| Model 2<br>(HR) (95% CI)          |   | (Reference)                             | 1.20 [0.92, 1.56]<br><i>p</i> =0.17 | 1.89 [1.34, 2.67]*<br><i>p</i> <0.001 | (Reference)         | 1.44 [1.02, 2.03]*<br><i>p</i> =0.038 | 2.16 [1.38, 3.37]*<br><i>p</i> =0.001 |
| Model 3<br>(HR) (95% CI)          |   | (Reference)                             | 1.09 [0.83, 1.42]<br><i>p</i> =0.53 | 1.90 [1.34, 2.69]*<br><i>p</i> <0.001 | (Reference)         | 1.44 [1.02, 2.05]*<br><i>p</i> =0.039 | 2.00 [1.26, 3.16]*<br><i>p</i> =0.003 |
|                                   |   | All-cause Mortality                     |                                     |                                       | Composite Endpoints |                                       |                                       |
| Fragmented QRS                    |   | Non-fQRS                                | Inferior fQRS                       | Anterior/Lateral fQRS                 | Non-fQRS            | Inferior fQRS                         | Anterior/Lateral fQRS                 |



|                               |   |             |                                       |                                       |             |                                       |                                       |
|-------------------------------|---|-------------|---------------------------------------|---------------------------------------|-------------|---------------------------------------|---------------------------------------|
| events, n (%)                 | N | 450 (68.5%) | 133 (60.5%)                           | 40 (48.2%)                            | 283 (43.1%) | 69 (31.4%)                            | 23 (27.7%)                            |
|                               | Y | 207 (31.5%) | 87 (39.6%)                            | 43 (51.8%)                            | 374 (56.9%) | 151 (68.6%)                           | 60 (72.3%)                            |
| Event Rate (100 person-years) |   | 11.5        | 15.5                                  | 23.2                                  | 48.7        | 54.2                                  | 65.1                                  |
| Crude Model                   |   | (Reference) | 1.31 [1.02, 1.68]*<br><i>p</i> =0.037 | 1.81 [1.31, 2.52]*<br><i>p</i> <0.001 | (Reference) | 1.27 [1.05, 1.53]*<br><i>p</i> =0.015 | 1.49 [1.13, 1.95]*<br><i>p</i> =0.004 |
| Model 1 (HR) (95% CI)         |   | (Reference) | 1.35 [1.05, 1.74]*<br><i>p</i> =0.019 | 2.00 [1.43, 2.77]*<br><i>p</i> <0.001 | (Reference) | 1.28 [1.05, 1.54]*<br><i>p</i> =0.012 | 1.54 [1.17, 2.02]*<br><i>p</i> =0.002 |
| Model 2 (HR) (95% CI)         |   | (Reference) | 1.34 [1.05, 1.73]*<br><i>p</i> =0.021 | 2.00 [1.44, 2.78]*<br><i>p</i> <0.001 | (Reference) | 1.27 [1.05, 1.54]*<br><i>p</i> =0.013 | 1.54 [1.17, 2.03]*<br><i>p</i> =0.002 |
| Model 3 (HR) (95% CI)         |   | (Reference) | 1.35 [1.04, 1.74]*<br><i>p</i> =0.024 | 1.84 [1.32, 2.56]*<br><i>p</i> <0.001 | (Reference) | 1.21 [1.00, 1.47]<br><i>p</i> =0.055  | 1.53 [1.16, 2.02]*<br><i>p</i> =0.003 |

\* denotes  $p < 0.05$  by the Cox linear regression model. HR: hazard ratio; CI: confidence interval

**Model 1:** age; **Model 2:** age, sex; **Model 3:** age, sex, BMI, hypertension, diabetes, prior hHF, coronary artery disease, CVA, eGFR, and LVEF.

hHF, hospitalization for heart failure; CV, cardiovascular; HR, hazard ratio; BMI, body mass index; CVA, cerebrovascular accident; DM,

diabetes mellitus; eGFR, estimated glomerular filtration rate; HTN, hypertension; LVEF, left ventricular ejection fraction

**Table S4. QRS duration as a continuous variable after excluding those presenting RBBB, LBBB, and PPM, and was categorized as  $\leq 110$ ms (reference) or  $>110$ ms.**

|                          |   | <b>Hospitalization for Heart failure (HHF)</b> |                                     | <b>All-cause Mortality</b> |                                    |
|--------------------------|---|------------------------------------------------|-------------------------------------|----------------------------|------------------------------------|
| QRS Duration             |   | QRS duration $\leq 110$ ms                     | QRS Duration $>110$ ms              | QRS duration $\leq 110$ ms | QRS Duration $>110$ ms             |
| Events, n                | N | 550                                            | 276                                 | 542                        | 83                                 |
|                          | Y | 60                                             | 57                                  | 284                        | 34                                 |
| Model 1<br>(HR) (95% CI) |   | (Reference)                                    | 1.733[1.298, 2.312]*<br>$p < 0.001$ | (Reference)                | 0.987[0.684, 1.422]<br>$p = 0.943$ |
| Model 2<br>(HR) (95% CI) |   | (Reference)                                    | 1.710[1.276, 2.289]*<br>$p < 0.001$ | (Reference)                | 0.980[0.676, 1.419]<br>$p = 0.914$ |
| Model 3<br>(HR) (95% CI) |   | (Reference)                                    | 1.654[1.215, 2.51]*<br>$p = 0.001$  | (Reference)                | 0.958[0.645, 1.423]<br>$p = 0.832$ |
|                          |   | <b>CV Mortality</b>                            |                                     | <b>Composite Endpoints</b> |                                    |
| QRS Duration             |   | QRS duration $\leq 110$ ms                     | QRS Duration $>110$ ms              | QRS duration $\leq 110$ ms | QRS Duration $>110$ ms             |
| Events, n                | N | 550                                            | 276                                 | 542                        | 83                                 |
|                          | Y | 60                                             | 57                                  | 284                        | 34                                 |
| Model 1<br>(HR) (95% CI) |   | (Reference)                                    | 1.733[1.298, 2.312]*<br>$p < 0.001$ | (Reference)                | 0.987[0.684, 1.422]<br>$p = 0.943$ |
| Model 2<br>(HR) (95% CI) |   | (Reference)                                    | 1.710[1.276, 2.289]*<br>$p < 0.001$ | (Reference)                | 0.980[0.676, 1.419]<br>$p = 0.914$ |
| Model 3                  |   | (Reference)                                    | 1.654[1.215, 2.51]*                 | (Reference)                | 0.958[0.645, 1.423]                |

|               |  |  |             |  |             |
|---------------|--|--|-------------|--|-------------|
| (HR) (95% CI) |  |  | $p = 0.001$ |  | $p = 0.832$ |
|---------------|--|--|-------------|--|-------------|

\* refers to  $p < 0.05$ .

**Model 1:** Age

**Model 2:** Age + Sex;

**Model 3:** Age + Sex + BMI, + HTN + DM + CHF + Hyperlipidemia + CVD + eGFR + LVEF;

HR, hazard ratio; CI, confidence interval; BMI, body mass index; HTN, hypertension; DM, diabetes mellitus; CHF, congestive heart failure; CVD, cardiovascular disease; eGFR, estimated glomerular filtration rate; LVEF, left ventricular ejection fraction; AF, atrial fibrillation

**Table S5. Biomarker, left ventricular structure and function in the patients with known coronary artery disease across non-fQRS, inferior fQRS, and anterior/lateral fQRS groups**

| Fragmented QRS group                      | Non-fQRS<br>(n= 215) | Inferior fQRS<br>(n= 76) | Anterior/lateral fQRS<br>(n= 34) | <i>p</i> value |
|-------------------------------------------|----------------------|--------------------------|----------------------------------|----------------|
| <b>Biomarker</b>                          |                      |                          |                                  |                |
| BNP, pg/mL (n=314) <sup>a</sup>           | 558[241, 1300]       | 695[268.5, 1480]         | 920.5[516, 3300]*†               | <0.001         |
| Troponin-I (n=309) <sup>a</sup>           | 0.04[0.02, 0.18]     | 0.06[0.02, 0.13]         | 0.14 [0.04, 0.62]*†              | 0.008          |
| <b>LV structure</b>                       |                      |                          |                                  |                |
| LV mass index, gm/m <sup>2</sup>          | 101.5 ± 29.5         | 104.5 ± 34.3             | 115.1 ± 32.8                     | 0.069          |
| LVEDV index, mL                           | 46.1 ± 14.5          | 46.4 ± 18.8              | 54.2 ± 17.3*                     | 0.038          |
| LVEF, %                                   | 63.5 ± 6.4           | 63.2 ± 7.6               | 61.6 ± 6.7                       | 0.307          |
| <b>LV systolic and diastolic function</b> |                      |                          |                                  |                |
| DT, ms                                    | 213.4 ± 78.6         | 213.0 ± 78.4             | 185.0 ± 78.4                     | 0.140          |
| IVRT, ms                                  | 88.1 ± 32.2          | 89.5 ± 35.2              | 95.3 ± 40.2                      | 0.521          |
| TDI-e', cm/s                              | 5.4 ± 1.6            | 5.0 ± 1.5                | 4.5 ± 1.3                        | 0.018          |
| TDI-s', cm/s                              | 5.4 ± 1.3            | 5.4 ± 1.6                | 4.8 ± 1.3                        | 0.199          |
| Mitral E / TDI-e'                         | 16.8 ± 7.7           | 18.0 ± 7.4               | 22.7 ± 13.3*                     | 0.012          |
| TR Velocity, cm/s                         | 2.98 ± 0.44          | 2.98 ± 0.43              | 3.17 ± 0.56                      | 0.086          |
| LA volume index, mL/m <sup>2</sup>        | 28.4 ± 12.7          | 27.9 ± 10.6              | 34.8 ± 13.9*†                    | 0.027          |

Data are expressed as mean ± SD or percentage.

\* *p*<0.05 vs Non-fQRS; † *p*<0.05 vs Inferior fQRS. <sup>a</sup> Troponin-I and BNP are expressed as median [25<sup>th</sup> percentile, 75<sup>th</sup> percentile].

LV, left ventricular; EDV, end-diastolic volume; LVEF, left ventricular ejection fraction; LVH, left ventricular hypertrophy; LV, left ventricular mass to volume ratio; DT, deceleration time; IVRT, interventricular relaxation time; LA, left atrial; TDI, tissue Doppler imaging; TR, tricuspid regurgitation. Other abbreviations as Table 1 and Table 2.

**Table S6. Hazard ratio of hospitalization for heart failure, cardiovascular death, all-cause death, and composite endpoint in the patients with known coronary artery disease and presence of inferior fQRS and anterior/lateral fQRS**

| Fragmented QRS group              | Non-fQRS<br>(n= 215)      |                         | Inferior fQRS<br>(n= 76)                |                                         | Anterior/lateral fQRS<br>(n= 34)        |                                         |
|-----------------------------------|---------------------------|-------------------------|-----------------------------------------|-----------------------------------------|-----------------------------------------|-----------------------------------------|
|                                   | Unadjusted<br>HR (95% CI) | Adjusted<br>HR (95% CI) | Unadjusted<br>HR (95% CI)               | Adjusted<br>HR (95% CI)                 | Unadjusted<br>HR (95% CI)               | Adjusted<br>HR (95% CI)                 |
| Hospitalization for heart failure | -<br>(reference)          | -<br>(reference)        | 1.14<br>(0.76-1.73)<br><i>p</i> = 0.523 | 0.98<br>(0.64-1.49)<br><i>p</i> = 0.908 | 1.26<br>(0.71-2.22)<br><i>p</i> = 0.425 | 1.23<br>(0.69-2.17)<br><i>p</i> = 0.484 |
| Cardiovascular death              | -<br>(reference)          | -<br>(reference)        | 1.26<br>(0.71-2.23)<br><i>p</i> = 0.430 | 1.25<br>(0.70-2.23)<br><i>p</i> = 0.460 | 2.46<br>(1.27-3.08)<br><i>p</i> = 0.007 | 2.60<br>(1.29-5.11)<br><i>p</i> = 0.007 |
| All-cause death                   | -<br>(reference)          | -<br>(reference)        | 1.12<br>(0.72-1.75)<br><i>p</i> = 0.613 | 1.10<br>(0.69-1.74)<br><i>p</i> = 0.692 | 2.29<br>(1.39-3.78)<br><i>p</i> = 0.001 | 2.27<br>(1.35-3.82)<br><i>p</i> = 0.002 |
| Composite endpoint                | -<br>(reference)          | -<br>(reference)        | 1.10<br>(0.80-1.52)<br><i>p</i> = 0.552 | 1.00<br>(0.72-1.39)<br><i>p</i> = 0.994 | 1.52<br>(1.00-2.32)<br><i>p</i> = 0.051 | 1.43<br>(0.93-2.20)<br><i>p</i> = 0.104 |

Adjusted for age, sex, body mass index, estimated glomerular infiltration rate, diabetes mellitus, hypertension  
fQRS, fragmented QRS; HR, hazard ratio; CI, confidence interval

**Figure S1.** Study flowchart showing the enrollment criteria for patients discharged with HFpEF. The patients with overt or incomplete bundle branch block or a permanent pacemaker were excluded. All study participants were divided into non-fQRS, inferior and anterior/lateral fQRS groups.

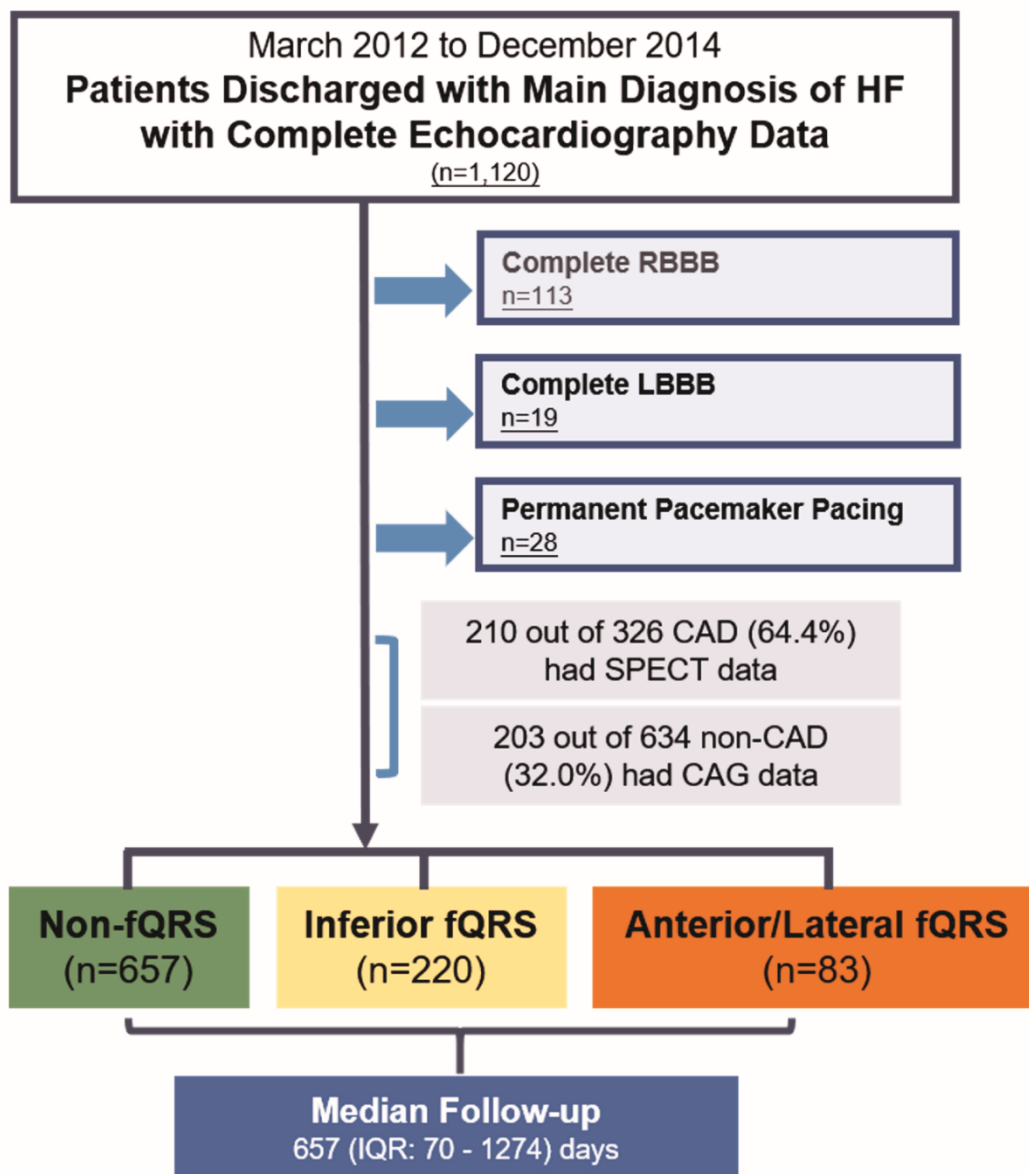

Supplement: JAH3-12-e028105-s001.pdf [file JAH3-12-e028105-s001.pdf]
